# Supplementary material for: A thermo-sensitive and injectable hydrogel derived from a decellularized amniotic membrane to prevent intrauterine adhesion by accelerating endometrium regeneration
Source: Royal Society of Chemistry journal article supplement (doi:10.1039/d1bm01791h), 2022-01-01
Supplement: d1bm01791h1.pdf [file d1bm01791h1.pdf]

## Supporting Information

### A Thermo-sensitive and Injectable Hydrogel Derived from Decellularized Amniotic Membrane to Prevent Intrauterine Adhesion by Accelerating Endometrium Regeneration

Xiaoyu Li, Peilin Li, Can Wang, Ting Shang, Haotian Han, Yongjuan Tong, Yubin Kang, Jianjun Fang, Lei Cui\*

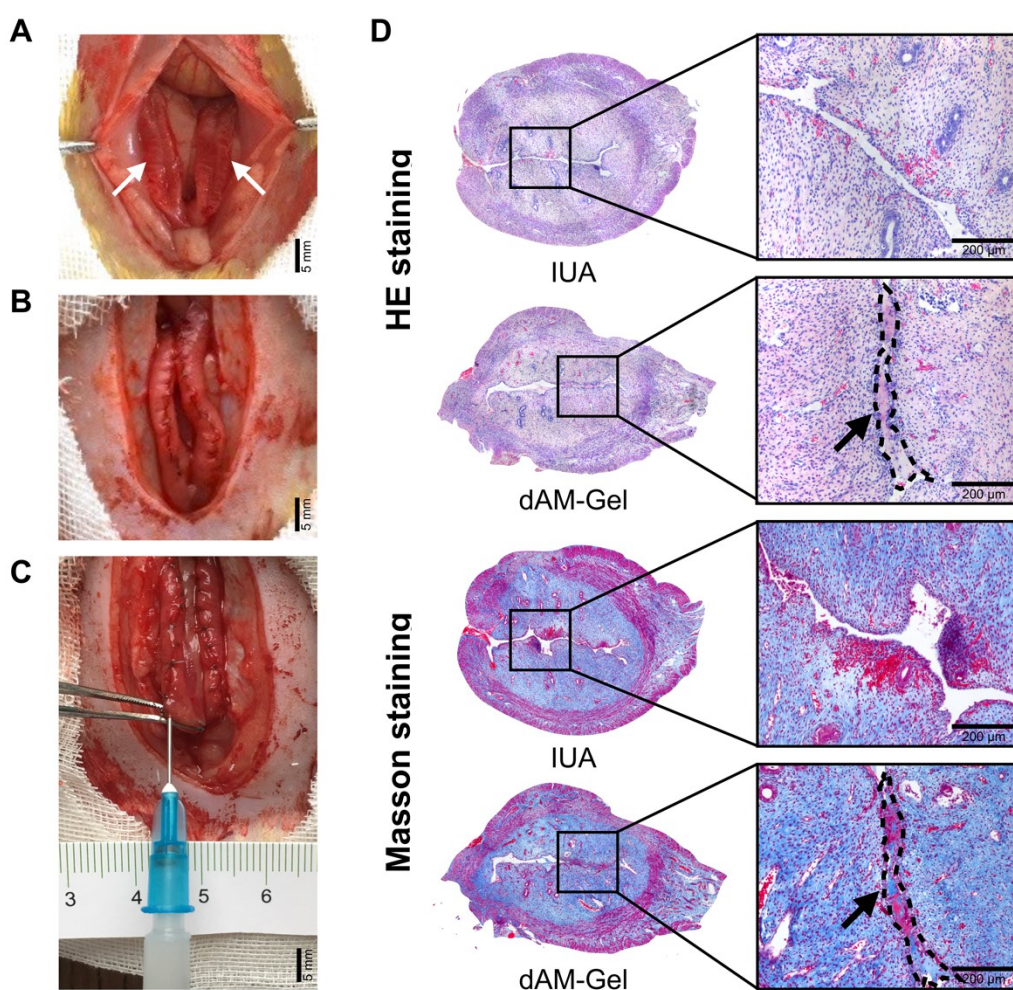

**Fig. S1.** Surgical creation of intrauterine adhesion model and injection of dAM-gel. (A) The process of surgical removal of endothelium, suturing of uterine (B) and dAM-gel injection (C). Arrows indicate scraped uterine. (D) H&E and Masson's staining of the uterine received scraping alone (control) or dAM-gel injection 30 min after surgery. Arrows and dotted circles indicate the dAM-gel injected into uterine cavity.

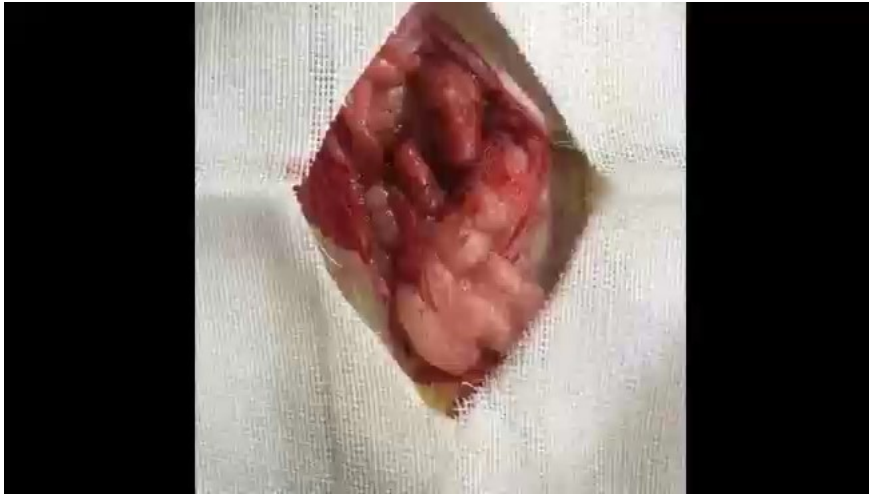

**Supplementary Movie 1.** The injecting process of dAM-gel into the uterus.
